# Supplementary material for: Photo-polymerization properties of type-II photoinitiator systems based on 2-chlorohexaaryl biimidazole (o-Cl-HABI) and various N-phenylglycine (NPG) derivatives!
Source: Royal Society of Chemistry journal article supplement (doi:10.1039/c8pp00300a), 2018-10-29
Supplement: c8pp00300a1.pdf [file c8pp00300a1.pdf]

**Photo-polymerization properties of Type-II photoinitiator systems based on 2-chlorohexaaryl biimidazole (o-Cl-HABI) and various *N*-phenylglycine (NPG) derivatives**

**Yung-Chung Chen\*, Yuan-Tsung Kuo, Tsung-Han Ho**

Department of Chemical and Materials Engineering, National Kaohsiung University of Science and Technology, 415 jiangong Rd., Sanmin District, Kaohsiung City 80778, Taiwan ROC

Corresponding authors: Yung-Chung Chen ([chenyc@nkust.edu.tw](mailto:chenyc@nkust.edu.tw))

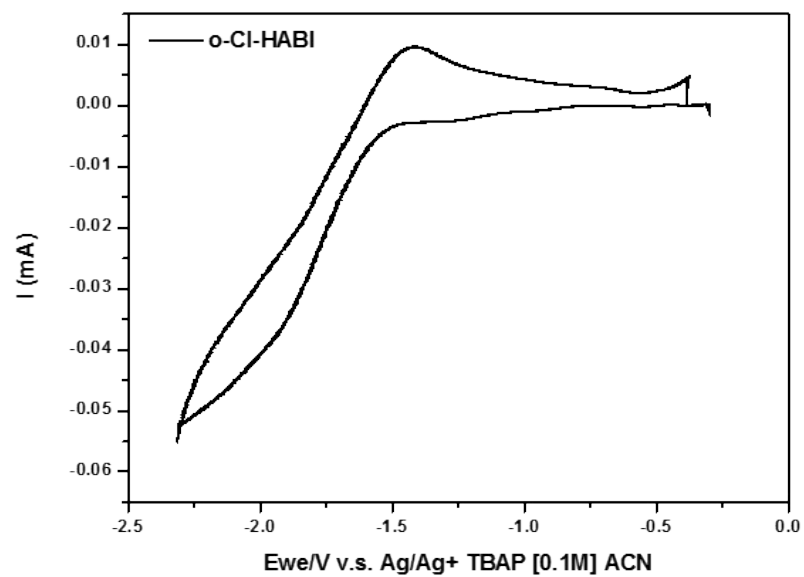

**Figure S1.** Reduction potential of the o-Cl-HABI in THF solutions
